# Supplementary material for: Correlation analysis of serum endothelial cell specific molecule-1, endothelial microparticles, hypoxia inducible factor-1α levels and acute myocardial infarction and their predictive value for major adverse cardiovascular events: a retrospective study
Source: PeerJ. 2025 Mar 18;13:e19111. doi: 10.7717/peerj.19111 (PMC11927558; doi:10.7717/peerj.19111)
Supplement: Supplemental Information 1 [file peerj-13-19111-s001.xlsx]

## Sheet: MACE group (n=25)
No	Sexuality	Age	BMI（kg/m2）	Number of diseased vessels	HIF-1α（ng/L）	EMPs （/μL ）	ESM-1（ng/mL）
1	Male	65	28.36	Single branch	58.6	472.6	0.73
2	Male	61	26.77	Double branch	46.7	540.1	1.54
3	Male	61	28.56	Double branch	44.1	450.7	1.54
4	Female	58	29.63	Three branches	51.5	383.7	1.05
5	Female	57	21.8	Single branch	50.1	349.9	0.97
6	Female	65	27.57	Single branch	44.2	357.8	1.64
7	Female	59	24.69	Three branches	39.3	498.1	1.39
8	Female	70	24.8	Single branch	55.9	450.7	0.82
9	Male	54	25.74	Single branch	52.4	473.1	1.31
10	Female	70	25.21	Double branch	53.5	447.1	1.32
11	Female	70	22.62	Single branch	47.1	438.2	1.91
12	Female	44	23.87	Double branch	54.7	386.1	1.72
13	Male	67	23.55	Single branch	63.4	424.4	1.67
14	Female	65	26.08	Three branches	47.7	448	2.06
15	Female	58	25.71	Double branch	58.3	441.1	2.01
16	Male	62	26.75	Single branch	42.5	388.8	1.7
17	Male	66	28.94	Single branch	48	419.1	0.61
18	Female	64	27.26	Single branch	55.3	485.8	1.1
19	Male	60	23.71	Three branches	76.9	348.9	1.35
20	Female	59	24.94	Double branch	62.1	485.6	1.79
21	Female	66	26.94	Double branch	51.1	442.5	1.93
22	Female	68	28.51	Three branches	45.1	415.8	0.69
23	Female	70	27.95	Single branch	40.8	463.3	1.18
24	Male	76	28.01	Double branch	46	418	1.41
25	Male	82	25.28	Single branch	33.3	483.6	1.92

## Sheet: non-MACE group (n=81)
No	Sexuality	Age	BMI（kg/m2）	Number of diseased vessels	HIF-1α（ng/L）	EMPs （/μL ）	ESM-1（ng/mL）
1	Female	75	26.44	Single branch	31.8	294.6	0.56
2	Male	73	23.76	Double branch	30.5	259.1	0.85
3	Female	52	23.54	Single branch	30	168.7	1.19
4	Female	63	26.01	Three branches	8.7	210.3	0.94
5	Male	79	24.33	Single branch	27.7	191.7	1.28
6	Female	71	30.5	Three branches	24.1	150.4	1.09
7	Female	62	28.48	Single branch	27.7	258	0.59
8	Female	68	26.55	Three branches	26.1	206.7	0.9
9	Female	52	28.14	Three branches	41.8	328.6	0.98
10	Male	71	28.08	Single branch	40.1	129.6	0.79
11	Male	57	28.08	Double branch	30.3	244.4	0.88
12	Male	50	27.03	Double branch	36.1	210.6	1.26
13	Male	68	32.84	Three branches	18.1	256.6	1.04
14	Female	59	28.7	Three branches	38	278	1.25
15	Female	60	29.28	Three branches	43.8	262.6	0.91
16	Female	48	23.92	Double branch	26.2	235.2	1.45
17	Male	66	30.59	Double branch	33.1	314.5	0.82
18	Female	71	19.24	Three branches	51	205.8	1.26
19	Female	56	28.6	Single branch	43.5	282.2	0.82
20	Female	60	30.68	Double branch	37	295.1	1.03
21	Male	56	24.69	Three branches	46.2	282.5	0.94
22	Female	77	22.53	Three branches	38.9	332.3	0.98
23	Male	56	27.06	Double branch	48.1	278.9	0.96
24	Male	52	26.85	Single branch	28.2	244.4	1.05
25	Female	95	29.08	Three branches	38.7	280.2	0.95
26	Male	52	25.42	Single branch	21.6	183.1	1.31
27	Female	55	28.07	Three branches	11.8	256.4	0.9
28	Male	61	25.94	Double branch	36.7	207.9	1.34
29	Female	52	25.01	Double branch	33.6	291.1	0.86
30	Female	63	25.29	Single branch	32.7	191.4	1.21
31	Female	55	29.44	Three branches	32.3	275.6	1.05
32	Male	56	25.67	Single branch	27.6	188.7	1.03
33	Female	62	25.94	Double branch	33.1	229.6	0.86
34	Female	58	21.65	Single branch	25.5	206.2	0.91
35	Male	49	26.68	Single branch	35	251.2	1.27
36	Male	71	27.81	Single branch	20.6	149.9	1.23
37	Female	65	23.28	Double branch	26.7	280.6	1.28
38	Female	73	29.01	Double branch	42.1	291.2	1.29
39	Female	71	26.86	Single branch	35.9	294.2	1.2
40	Male	51	23.97	Single branch	32.1	264.7	1.41
41	Female	80	25.96	Single branch	35.6	202.4	0.96
42	Male	75	27.82	Three branches	31.6	177.3	1.2
43	Female	68	29.85	Three branches	50.8	187.7	1.09
44	Male	65	26.45	Three branches	28.2	276.4	0.93
45	Male	57	30.58	Single branch	23	280.4	1
46	Male	61	22.9	Double branch	26.9	239.6	1.16
47	Female	70	24.99	Single branch	41.5	233.3	1.1
48	Female	59	27.33	Single branch	32.1	336.4	0.96
49	Male	67	27.1	Three branches	24.8	279.6	1.32
50	Male	70	27.13	Single branch	34.5	318.9	1.15
51	Male	52	25.23	Double branch	26.7	308.7	1.12
52	Male	60	26.03	Three branches	30.3	264.2	1.41
53	Female	59	25.05	Single branch	30	249.1	1.05
54	Female	63	19.67	Three branches	22.1	265	1.36
55	Male	61	28.38	Single branch	39.7	284.5	1.16
56	Female	71	23.91	Single branch	16.1	352.5	0.97
57	Female	59	25.49	Single branch	27.8	326	1.05
58	Female	64	25.18	Three branches	38.4	210.7	1.05
59	Female	65	27.42	Single branch	23.4	313.4	0.94
60	Male	54	22.51	Three branches	19.8	260.1	1.23
61	Male	56	22.49	Double branch	30.4	257.1	1.23
62	Female	56	26.13	Single branch	16.1	253.7	0.97
63	Female	63	30.34	Double branch	36.6	217.3	1.24
64	Male	66	34	Three branches	33.1	315.9	1.19
65	Male	68	30.76	Three branches	42.4	276.2	0.9
66	Male	49	27.98	Three branches	49	162.7	0.92
67	Female	68	23.88	Three branches	44.7	212.6	0.85
68	Female	68	23.81	Three branches	23.2	191.7	1.2
69	Male	69	26.16	Double branch	30.1	316.8	1.05
70	Male	60	29.1	Three branches	51.1	332.3	1.13
71	Male	80	29.46	Double branch	32.2	340.2	0.89
72	Male	50	27.35	Double branch	17.1	232.2	1.22
73	Female	69	33.68	Single branch	28.8	343.3	0.83
74	Female	61	26.92	Double branch	38.8	278.8	1.39
75	Female	65	22.02	Single branch	37.6	240.6	1.21
76	Male	54	28.42	Single branch	35.6	260.4	1.08
77	Male	60	26.24	Single branch	39	155.5	1.13
78	Female	53	27.77	Double branch	20.2	374.7	1.16
79	Male	67	21.25	Single branch	40.9	184.5	1.31
80	Male	59	25.82	Single branch	33	220.4	1.01
81	Female	69	29.27	Single branch	29.5	284.2	1.22

## Sheet: control group（n=70）
No	HIF-1α（ng/L）	EMPs （/μL ）	ESM-1（ng/mL）
1	26.1	201.9	1.11
2	17.6	133.9	1.03
3	14.3	217.9	0.94
4	14.7	208.5	1
5	28	192.3	1
6	17.8	153.1	1
7	20.6	164.1	1.01
8	19.4	201	0.95
9	26.2	178.6	1.06
10	19.8	250.6	1.09
11	17.1	180.1	1.02
12	26.1	200.6	1.03
13	23.8	143.5	1.06
14	21.8	142.3	0.88
15	8.5	203.1	1.03
16	24	280.7	1.01
17	16.2	165.6	1.06
18	32.1	183.3	1.03
19	22.2	180.4	1
20	22.3	219	0.95
21	23.9	282.2	1
22	17.9	246.7	0.98
23	11.3	205.3	0.99
24	20.9	236.8	1
25	21.7	203.4	0.94
26	15.9	271.2	1.1
27	20.3	184.8	1.06
28	17.5	183.2	1
29	23.8	195.2	1.02
30	11.4	186.2	1.01
31	18.5	172.4	0.86
32	21.9	193.5	0.98
33	9.8	227	1.06
34	14.6	198.3	1
35	24.6	134.1	1.02
36	31.4	247.2	1.05
37	13.8	225	1
38	23.6	155.6	1.04
39	14.8	182.6	0.96
40	28.1	193.3	0.98
41	18.3	167.3	1.05
42	18.8	176.9	1.08
43	18	207.3	1.02
44	17.1	200	1.12
45	19.1	191.3	1.04
46	22.3	259.1	1.02
47	21.2	211.5	1.09
48	29.2	179.6	0.94
49	32.6	142.9	0.97
50	23.7	209.1	1.04
51	15	144.1	1.01
52	17.8	242.8	1.09
53	24.4	152.4	0.94
54	22.2	248.1	1.05
55	18.1	227.3	1.06
56	16.2	239.5	1.16
57	25.5	210.6	1.04
58	26.4	182.3	1.07
59	30.6	142.7	0.87
60	21.6	290.1	1.02
61	6.9	197.1	1.13
62	20	151.3	0.98
63	18.7	178.9	0.97
64	35.1	209.1	1
65	16.8	258.2	1
66	22.6	191.1	1.02
67	22.2	215.6	1.21
68	17.8	156.1	0.98
69	14.3	147.4	1
70	23.2	249	0.99
